# Supplementary material for: Fabrication of water-resistant fluorescent ink using the near-unity photoluminescence quantum yield of CsPbBr3 doped with NiBr2
Source: Royal Society of Chemistry journal article supplement (doi:10.1039/d4nr00668b), 2024-01-01
Supplement: d4nr00668b1.pdf [file d4nr00668b1.pdf]

## Supporting Information

### Fabrication of Water-Resistant Fluorescent Ink by Near-Unity Photoluminescence Quantum yield of Doped CsPbBr<sub>3</sub> via NiBr<sub>2</sub>

Dipanwita Roy,<sup>a</sup> Shramana Guha<sup>a</sup> and Somobrata Acharya\*<sup>a,b</sup>

<sup>a</sup> School of Applied and Interdisciplinary Sciences, Indian Association for the Cultivation of Science, Jadavpur, Kolkata 700032 (India).

<sup>b</sup> Technical Research Centre, Indian Association for the Cultivation of Science, Jadavpur, Kolkata 700032 (India).

Corresponding Author: [camsa2@iacs.res.in](mailto:camsa2@iacs.res.in)

#### Contents:

|                                                                    |           |
|--------------------------------------------------------------------|-----------|
| 1. FFT .....                                                       | Figure S1 |
| 2. EDX spectra of NCs.....                                         | Figure S2 |
| 3. Ni/Pb ratio from ICP-AES.....                                   | Table S1  |
| 4. XPS spectra with increasing Ni <sup>2+</sup> concentration..... | Figure S3 |
| 5. NMR spectra.....                                                | Figure S4 |
| 6. TGA plot.....                                                   | Figure S5 |
| 7. Lattice parameter change with Ni/Pb ratio.....                  | Figure S6 |
| 8. PL intensity with dopant concentration.....                     | Figure S7 |
| 9. Images under UV-illumination.....                               | Figure S8 |
| 10. PL intensity with dopant concentration.....                    | Figure S8 |
| 11. PLQY with change in dopant concentration.....                  | Table S2  |
| 12. Comparison of PLQYs with literatures.....                      | Table S3  |
| 13. Time-resolved photoluminescence decay parameters.....          | Table S4  |
| 14. Change in radiative and non-radiative decay rate.....          | Table S5  |

15. Temperature Dependent PL.....Figure S9  
 16. Images of ink in thin film.....Figure S10  
 17. PL intensity in water with time.....Figure S11

## Supporting Figures

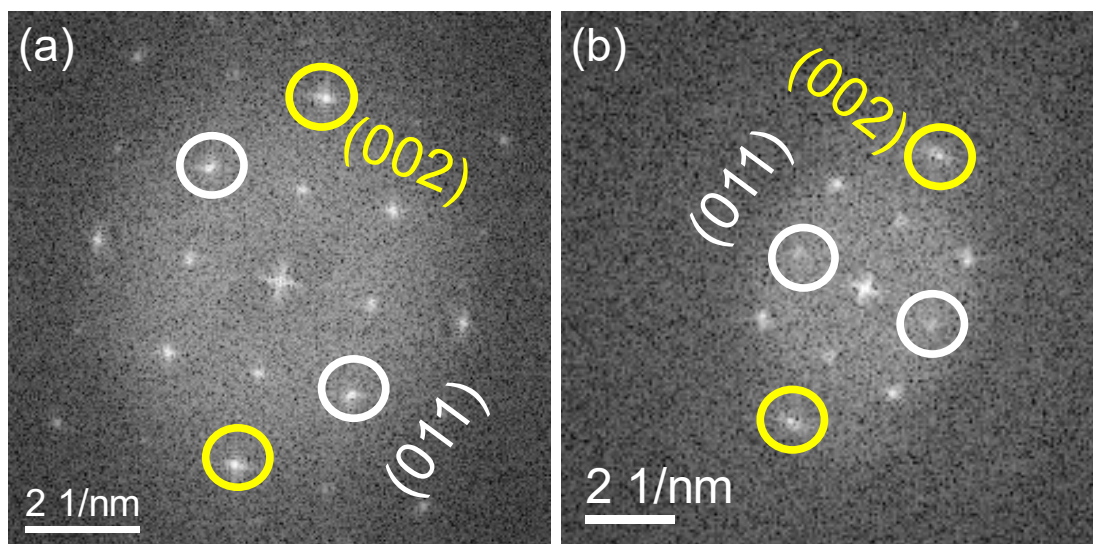

**Fig. S1** FFT patterns of (a) CsPbBr<sub>3</sub> NCs (b) Ni<sup>2+</sup> doped CsPbBr<sub>3</sub> NCs showing spots corresponding to (011) and (002) planes.

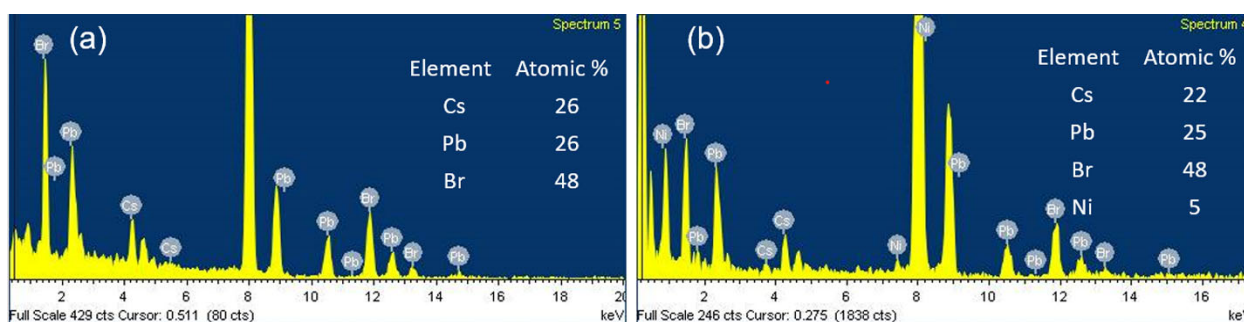

**Fig. S2** (a-b) EDX showing the constituent elements of CsPbBr<sub>3</sub> NCs and Ni<sup>2+</sup> doped CsPbBr<sub>3</sub> NCs. Insets show the atomic percentage of the elements confirming the effective doping of Ni<sup>2+</sup> in CsPbBr<sub>3</sub> NCs. The EDX shown in right panel corresponds to Ni/Pb ratio of 0.34 (corresponding Ni/Pb molar ratio used in synthesis is 0.5).

| <i>Ni/Pb Elemental Ratio (from ICP)</i> | <i>Ni/Pb Molar Ratio Used in the Synthesis</i> |
|-----------------------------------------|------------------------------------------------|
| 0                                       | 0                                              |
| 0.075                                   | 0.1                                            |
| 0.18                                    | 0.25                                           |
| 0.26                                    | 0.35                                           |
| <b>0.38</b>                             | <b>0.5</b>                                     |
| 0.53                                    | 0.7                                            |

**Table S1.** Ni/Pb molar ratio used in the synthesis for the variation of Ni dopant concentration and the elemental ratio measured using ICP-AES showing Ni-incorporation in CsPbBr<sub>3</sub> NCs.

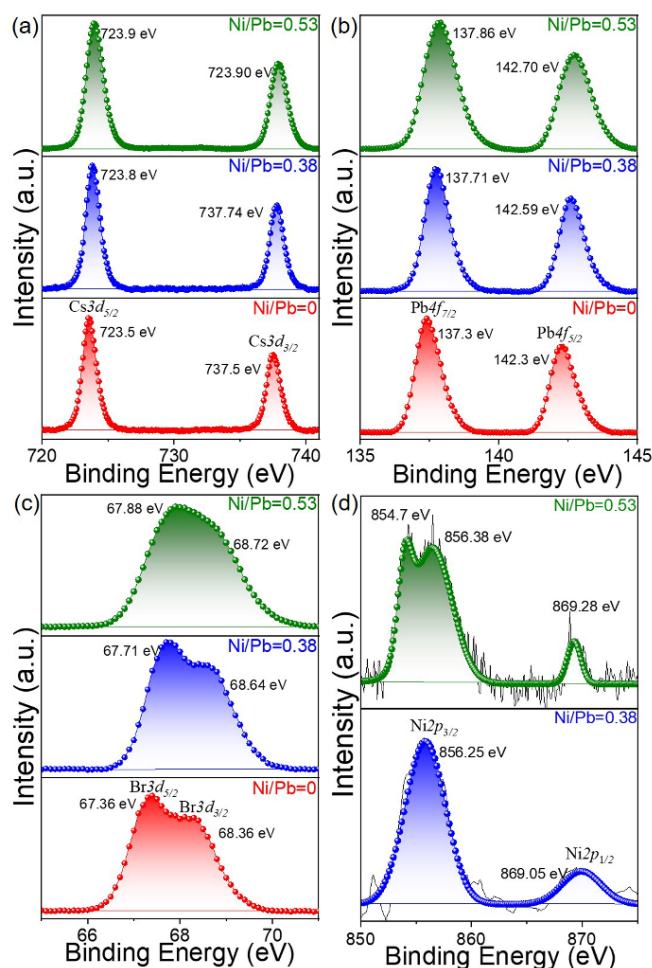

**Fig. S3** XPS spectra for CsPbBr<sub>3</sub> NCs (red, Ni/Pb=0) and Ni<sup>2+</sup> doped CsPbBr<sub>3</sub> NCs (blue, Ni/Pb=0.38 and green, Ni/Pb=0.53) showing the change in octahedral environment upon increasing Ni<sup>2+</sup> concentration. The Ni/Pb ratio from ICP-AES is used in legends. For Ni/Pb=0.53,

an additional peak for Ni 2p appears at ~854.7 eV due to the surface Ni-O bonds which may relate to the bonding between surface Ni<sup>2+</sup> and ligands.<sup>1</sup>

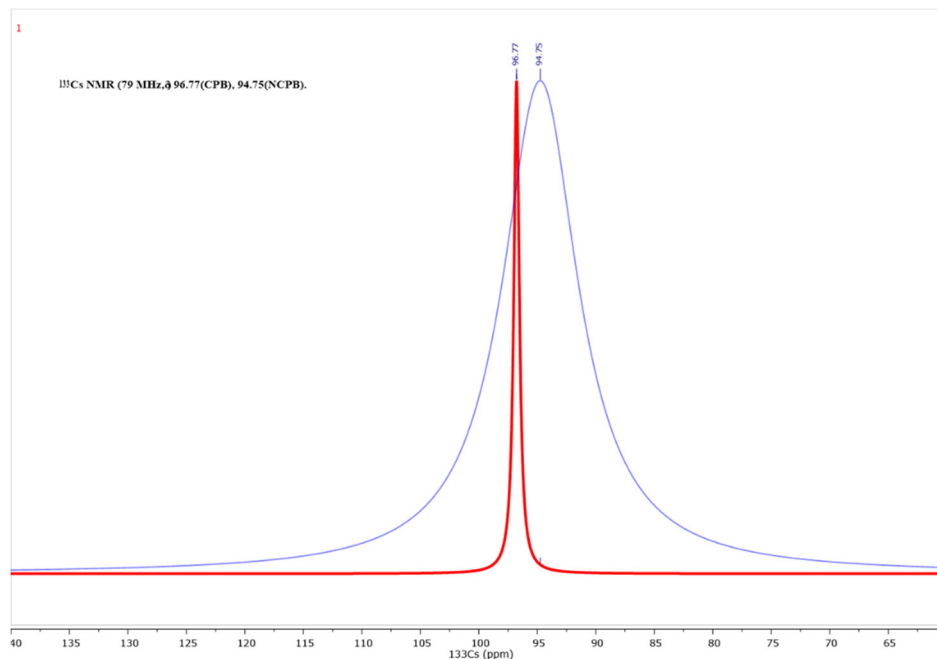

**Fig. S4** <sup>133</sup>Cs NMR spectra for both CsPbBr<sub>3</sub> (red line) and Ni<sup>2+</sup> doped CsPbBr<sub>3</sub> (blue line) NCs showing change in local environment of [PbBr<sub>6</sub>]<sup>4-</sup> octahedra upon Ni<sup>2+</sup> incorporation in CsPbBr<sub>3</sub> NCs.

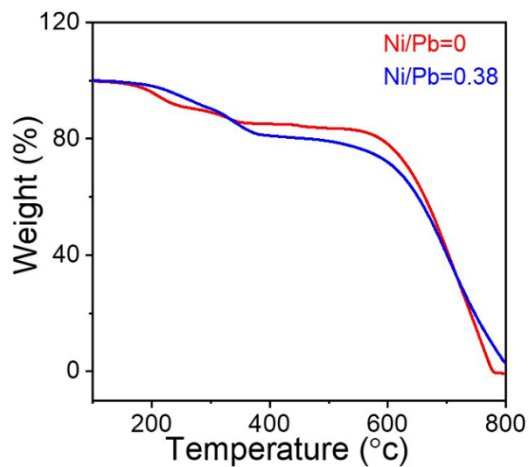

**Fig. S5** TGA curves for both CsPbBr<sub>3</sub> (red line) and Ni<sup>2+</sup> doped CsPbBr<sub>3</sub> (blue line) NCs showing extent of thermal stability.

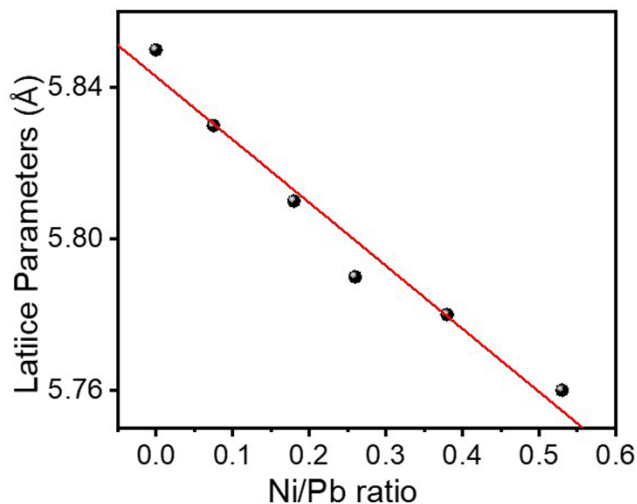

**Fig. S6** Lattice parameters versus Ni/Pb elemental ratio (obtained from ICP-AES) shows linear relationship.

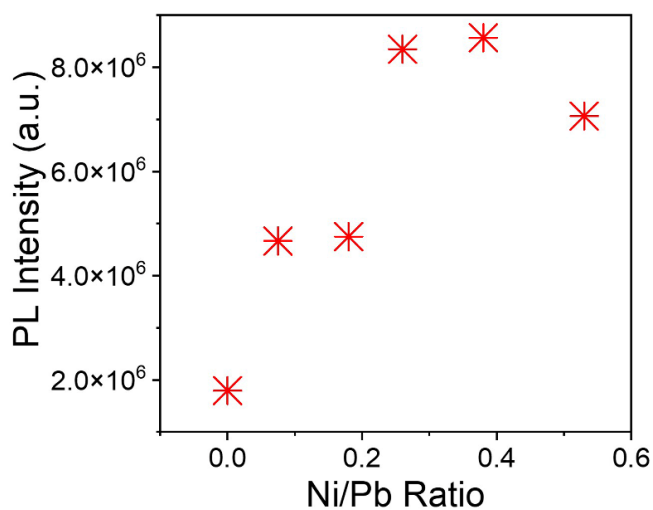

**Fig. S7** Variation of PL intensity with changing the Ni/Pb elemental ratio (obtained from ICP-AES).

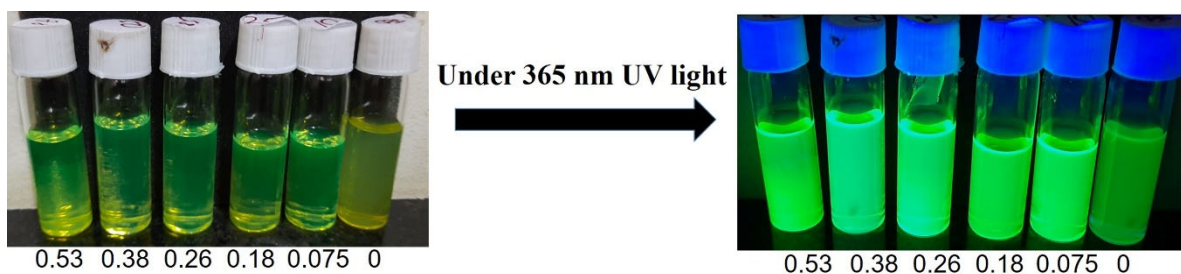

**Fig. S8** The images of the doped and undoped CsPbBr<sub>3</sub> NCs in hexane with changing Ni/Pb elemental ratio (obtained from ICP-AES).

| <i>Ni/Pb Elemental Ratio<br/>(from ICP-AES)</i> | <i>Ni/Pb Molar ratio<br/>used in the synthesis</i> | <i>PLQY (%)</i> |
|-------------------------------------------------|----------------------------------------------------|-----------------|
| 0                                               | 0                                                  | 68              |
| 0.075                                           | 0.1                                                | 72              |
| 0.18                                            | 0.25                                               | 78              |
| 0.26                                            | 0.35                                               | 81              |
| <b>0.38</b>                                     | <b>0.5</b>                                         | <b>98</b>       |
| 0.53                                            | 0.7                                                | 72              |

**Table S2.** Comparison of PLQY with increasing dopant concentration measured from ICP-AES and Ni/Pb molar ratio used in the synthesis.

| <b>Literature</b> | <b>Material</b>                                                 | <b>PLQY</b>   | <b>Ni Concentration</b>                                                           |
|-------------------|-----------------------------------------------------------------|---------------|-----------------------------------------------------------------------------------|
| 2                 | Ni <sup>2+</sup> doped CsPbCl <sub>3</sub>                      | 96.5%         | 11.9%                                                                             |
|                   | Ni <sup>2+</sup> doped CsPbCl <sub>2.4</sub> Br <sub>0.6</sub>  | 92%           | 2.8%                                                                              |
|                   | Ni <sup>2+</sup> doped CsPbCl <sub>2</sub> Br                   | 93%           | 2.2%                                                                              |
| 3                 | Ni <sup>2+</sup> doped CsPbCl <sub>3</sub>                      | 72%           | 6.1% Ni                                                                           |
|                   | Ni <sup>2+</sup> and Pr <sup>3+</sup> doped CsPbCl <sub>3</sub> | 89%           |                                                                                   |
| 4                 | Ni <sup>2+</sup> doped CsPbBr <sub>3</sub>                      | 82.9%         | Feed molar ratio Ni/Pb=2.5                                                        |
| 5                 | Ni <sup>2+</sup> doped CsPbBr <sub>3</sub> powder               | 39.27%        | 8.5%                                                                              |
| 6                 | Ni <sup>2+</sup> doped CsPbBr <sub>3</sub> nanoplatelets        | 78%           | From Ni-Br mixed solution (0.2 mmol NiBr <sub>2</sub> in 0.2 ml HBr) 0.35 μL used |
| 7                 | Ni <sup>2+</sup> doped CsPbBr <sub>3</sub> nanocrystals         | Not available | -                                                                                 |
| 8                 | Ni <sup>2+</sup> doped CsPbBr <sub>3</sub> quantum dots         | 70.62%        | 22%                                                                               |
|                   |                                                                 | 90.77%        | after Pb <sub>3</sub> (PO <sub>4</sub> ) <sub>2</sub> coating                     |
| <b>Our work</b>   | <b>Ni<sup>2+</sup> doped CsPbBr<sub>3</sub> nanocrystals</b>    | <b>98%</b>    | <b>~5.6%</b>                                                                      |

**Table S3.** Comparison of PLQY with dopant (Ni<sup>2+</sup>) concentration obtained from literatures. <sup>2-8</sup>

| <i>Ni/Pb Elemental Ratio (from ICP-AES)</i> | $\tau_1$ (ns) | $\tau_2$ (ns) | $\tau_3$ (ns) | $A_1$      | $A_2$      | $A_3$       | $\tau_{avg}$ (ns) |
|---------------------------------------------|---------------|---------------|---------------|------------|------------|-------------|-------------------|
| 0                                           | 11.6          | 61.0          | 2.6           | 0.20       | 0.02       | 0.78        | 5.4               |
| 0.075                                       | 8.7           | 3.9           | 34.0          | 0.30       | 0.67       | 0.03        | 5.4               |
| 0.18                                        | 7.8           | 2.2           | 32.2          | 0.25       | 0.02       | 0.73        | 4.8               |
| 0.26                                        | 6.7           | 23.6          | 2.0           | 0.29       | 0.03       | 0.68        | 4.6               |
| <b>0.38</b>                                 | <b>5.1</b>    | <b>1.4</b>    | <b>15.9</b>   | <b>0.5</b> | <b>0.4</b> | <b>0.09</b> | <b>4.0</b>        |
| 0.53                                        | 10.5          | 38.6          | 3.1           | 0.24       | 0.02       | 0.74        | 5.6               |

**Table S4.** Time-resolved photoluminescence decay parameters of the CsPbBr<sub>3</sub> and Ni<sup>2+</sup> doped CsPbBr<sub>3</sub> NCs while varying the amount of dopant.

| <i>Ni/Pb Elemental Ratio (from ICP-AES)</i> | $K_r(s^{-1}) \times 10^9$ | $K_{nr}(s^{-1}) \times 10^9$ |
|---------------------------------------------|---------------------------|------------------------------|
| 0                                           | 0.125                     | 0.185                        |
| 0.075                                       | 0.133                     | 0.052                        |
| 0.18                                        | 0.1625                    | 0.0458                       |
| 0.26                                        | 0.2025                    | 0.0475                       |
| <b>0.38</b>                                 | 0.213                     | 0.0044                       |
| 0.53                                        | 0.128                     | 0.05                         |

**Table S5.** Radiative ( $K_r$ ) and non-radiative ( $K_{nr}$ ) decay rate of the CsPbBr<sub>3</sub> and Ni<sup>2+</sup> doped CsPbBr<sub>3</sub> NCs while varying dopant concentration.

\*Equation 1,2 have been followed to calculate the Radiative ( $K_r$ ) and non-radiative ( $K_{nr}$ ) decay rates:

$$k_{tot} = k_{nr} + k_r = 1/\tau_{avg} \dots\dots(\text{equation 1}); \quad k_r = PLQY/\tau_{avg} \dots\dots(\text{equation 2})$$

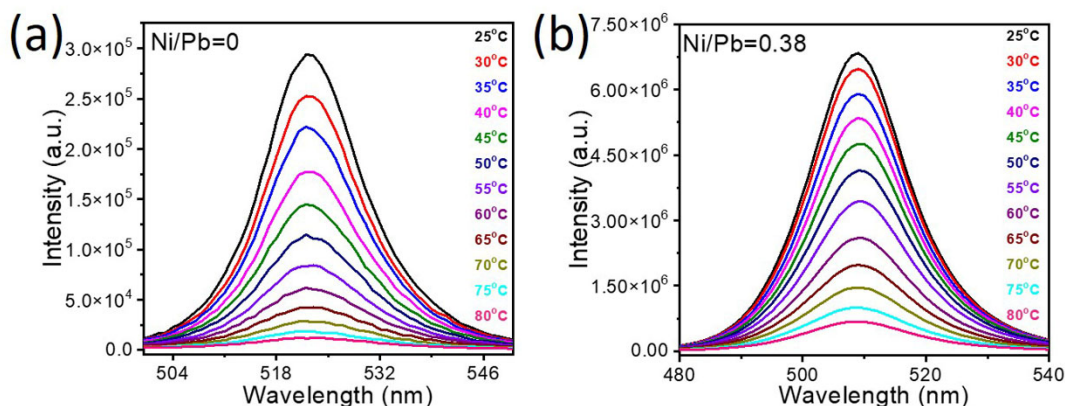

**Fig. S9** (a-b) Temperature dependent PL confirming the trends in reduction of PL with temperature is similar with the luminescent ink. The extent of drop of PL is maximized for pristine one compared to the doped CsPbBr<sub>3</sub> NCs (elemental ratio of Ni/Pb=0.38). This observation supports the fact that Ni<sup>2+</sup> doped CsPbBr<sub>3</sub> NCs show enhanced temperature stability.

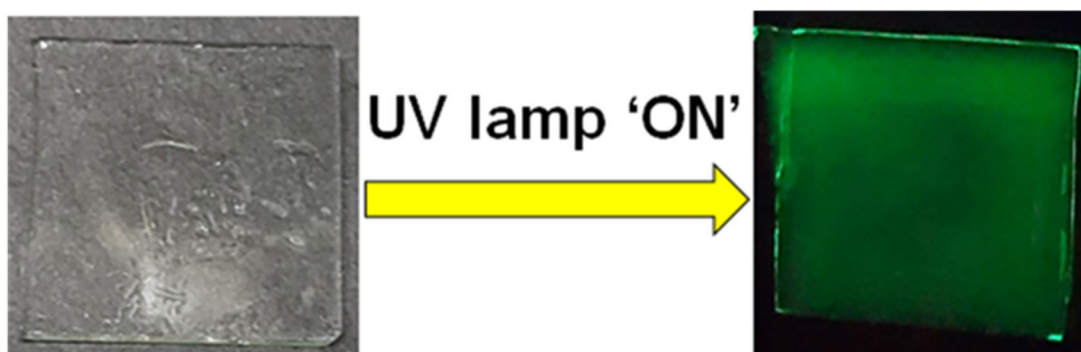

**Fig. S10** The thin glass-film of the fluorescent ink placed on paper shows its transparency (left-side). The right-side image shows the luminescence nature of the thin film under the UV light illumination at 365 nm after several heating-cooling cycles.

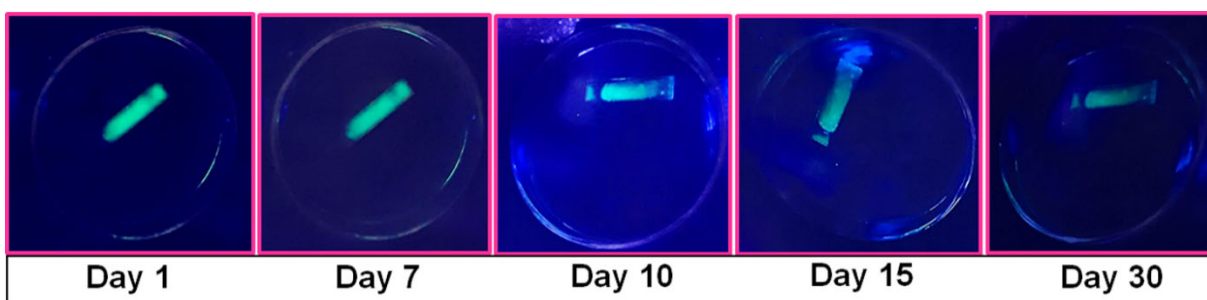



**Fig. S11** Images of luminescence of the thin film of the fluorescent ink stored in water for several days (under UV light illumination).

**References:**

- 1 A. Shapiro, M. W. Heindl, F. Horani, M.-H. Dahan, J. Tang, Y. Amouyal and E. Lifshitz, *J. Phys. Chem. C*, 2019, **123**, 24979–24987.
- 2 Z.-J. Yong, S.-Q. Guo, J.-P. Ma, J.-Y. Zhang, Z.-Y. Li, Y.-M. Chen, B.-B. Zhang, Y. Zhou, J. Shu, J.-L. Gu, L.-R. Zheng, O. M. Bakr and H.-T. Sun, *J. Am. Chem. Soc.*, 2018, **140**, 9942–9951.
- 3 J. Lyu, B. Dong, G. Pan, L. Sun, X. Bai, S. Hu, B. Shen, B. Zhou, L. Wang, W. Xu, D. Zhou, L. Xu and H. Song, *Nanoscale*, 2021, **13**, 16598–16607.
- 4 H. Kim, S.-R. Bae, T. H. Lee, H. Lee, H. Kang, S. Park, H. W. Jang and S. Y. Kim, *Adv. Funct. Mater.*, 2021, **31**, 2102770.
- 5 T. Chen, R. Liu, S. Tang, X. Li, S. Ye, X. Duan, R. Wang, Y. Shi, J. Yang, F. Qiu, Y. Yang, X. Wen and C. Wang, *AIP Adv.*, 2021, **11**, 115008.
- 6 J. Song, Y. Gao, Z. Meng, Z. Jiang, X. Cao, Q. Zeng and T. Hu, *Opt. Mater. (Amst.)*, 2023, **138**, 113611.
- 7 S. Thawarkar, P. J. S. Rana, R. Narayan and S. P. Singh, *Langmuir*, 2019, **35**, 17150–17155.
- 8 D. Huang, J. Bo, R. Zheng, C. Luo, X. Sun, Q. Li, D. Shen, Z. Zheng, M. Chen, Y. Yang, A. Tang, S. Chen and Y. Chen, *Adv. Opt. Mater.*, 2021, **9**, 2100474.
